# Supplementary material for: Willingness to vaccinate against COVID-19 in the US: Longitudinal evidence from a nationally representative sample of adults from April–October 2020
Source: PubMed Central journal article supplement — medRxiv. 2020 Nov 30:2020.11.27.20239970. Preprint. [Version 1] doi: 10.1101/2020.11.27.20239970 (PMC7709168; doi:10.1101/2020.11.27.20239970), 2020-11-30
Supplement: NIHPP2020.11.27.20239970-supplement-1.pdf [file NIHPP2020.11.27.20239970-supplement-1.pdf]

Table S1. Results of unadjusted multinomial logistic regression analyses examining the relative risk of being undecided or unwilling to vaccinate against COVID-19 in October compared to April, 2020.

| Variable                       | Undecided on vaccination |              | Unwilling to vaccinate |              |
|--------------------------------|--------------------------|--------------|------------------------|--------------|
|                                | RRR <sup>a</sup>         | (95% CI)     | RRR <sup>a</sup>       | (95% CI)     |
| Overall sample                 | 1.82***                  | (1.62, 2.05) | 2.29***                | (2.11, 2.48) |
| Age group                      |                          |              |                        |              |
| 18-34                          | 1.75***                  | (1.34, 2.27) | 2.37***                | (1.98, 2.84) |
| 35-49                          | 1.84***                  | (1.49, 2.27) | 2.26***                | (1.95, 2.62) |
| 50-64                          | 1.92***                  | (1.56, 2.35) | 2.54***                | (2.18, 2.95) |
| 65+                            |                          |              |                        |              |
| Sex                            |                          |              |                        |              |
| Male                           | 1.80***                  | (1.48, 2.18) | 2.12***                | (1.87, 2.41) |
| Female                         | 1.90***                  | (1.64, 2.20) | 2.48***                | (2.23, 2.76) |
| Race/ethnicity                 |                          |              |                        |              |
| White                          | 1.97***                  | (1.72, 2.25) | 2.32***                | (2.12, 2.54) |
| Hispanic                       | 1.89***                  | (1.32, 2.68) | 2.52***                | (2.00, 3.17) |
| Black                          | 1.41*                    | (1.03, 1.92) | 2.08***                | (1.62, 2.67) |
| Other race/<br>ethnicity       | 3.49***                  | (1.94, 6.29) | 2.70***                | (1.79, 4.06) |
| Education                      |                          |              |                        |              |
| Degree                         | 1.71***                  | (1.32, 2.21) | 2.09***                | (1.82, 2.41) |
| No degree                      | 2.01***                  | (1.75, 2.31) | 2.52***                | (2.28, 2.79) |
| Income level <sup>b</sup>      |                          |              |                        |              |
| Low income                     | 2.01***                  | (1.70, 2.37) | 2.53***                | (2.20, 2.92) |
| Middle income                  | 1.83***                  | (1.48, 2.25) | 2.17***                | (1.92, 2.46) |
| High income                    | 1.70***                  | (1.18, 2.42) | 2.31***                | (1.93, 2.77) |
| Chronic condition <sup>c</sup> |                          |              |                        |              |
| No                             | 1.77***                  | (1.53, 2.05) | 2.23***                | (2.02, 2.46) |
| Yes                            | 1.93***                  | (1.59, 2.34) | 2.48***                | (2.15, 2.86) |

<sup>a</sup> RRR = Relative risk ratio. For all analyses “willing to vaccinate” was the outcome reference group.

<sup>b</sup> Households earning less than \$40,000 a year classified as low income, those earning \$40,000 - \$100,000 middle income, and those above this threshold as high-income.

<sup>c</sup> Diagnosed with any of the following: diabetes, cancer, heart disease, kidney disease, asthma, chronic lung disease, an autoimmune disease.

\*  $P < .05$ . \*\*  $P < .01$ . \*\*\*  $P < .001$
